# Supplementary material for: How is recovery defined and measured in patients with low back pain? Protocol for a mixed study systematic review
Source: PubMed Central journal article supplement — BMJ Open. 2022 May 10;12(5):e061475. doi: 10.1136/bmjopen-2022-061475 (PMC9092166; doi:10.1136/bmjopen-2022-061475), 2022-05-10
Supplement: bmjopen-2022-061475supp001.pdf [file bmjopen-2022-061475supp001.pdf]

**Supplementary File 1**

Ovid MEDLINE(R) ALL &lt;1946 to November 29, 2021&gt;

- 1 Low Back Pain/ 24141
- 2 Sciatica/ 5110
- 3 (Low back pain or low back ach\$ or lumbago or (low\$ adj5 back pain) or (low\$ adj5 back ach\$) or low back strain or low\$ back pain\$ or (simpl\$ adj5 low\$ back pain) or (mechanic\$ adj5 low\$ back pain) or (non-specific adj5 low\$ back pain) or backache or back pain or back pain or simple back pain or low back syndrome or low back dysfunction or non-specific back pain or lumbar pain).ti,ab. 56556
- 4 (spine or lumbar spine).ti,ab. 126553
- 5 (((pain\* or tear or tears or injur\* or sprain\* or strain\* or dislocation\*) adj4 (disc or discs or sacral or lumbo\* or back or spine or spinal or lumbar)) or hernia\*) adj3 (disc or discs)).ti,ab. 12431
- 6 spinal injuries.ti,ab. 2144
- 7 spinal injuries/ or spinal fractures/ 24623
- 8 dorsalgia.ti,ab. 103
- 9 spinal diseases/ or intervertebral disc degeneration/ or intervertebral disc displacement/ or "ossification of posterior longitudinal ligament"/ or spinal curvatures/ or kyphosis/ or lordosis/ or scoliosis/ or spinal neoplasms/ or spinal osteochondrosis/ or scheuermann disease/ or spinal osteophytosis/ or hyperostosis, diffuse idiopathic skeletal/ or spinal stenosis/ or spondylitis/ or discitis/ or spondylarthritis/ or osteoarthritis, spine/ or spondylarthropathies/ or arthritis, psoriatic/ or arthritis, reactive/ or spondylitis, ankylosing/ or spondylosis/ or spondylolysis/ 126018
- 10 back disorder\$.ti,ab. 641
- 11 spine/ or intervertebral disc/ or lumbar vertebrae/ or spinal canal/ or vertebral body/ 98246
- 12 (radiculopathy or radiculilits or radicular pain\*).tw,kf. 9101
- 13 (Recovery or recover\* or resolution or resol\*).ti,ab. 1365861
- 14 1 or 2 or 3 or 4 or 5 or 6 or 7 or 8 or 9 or 10 or 11 or 12 312515
- 15 13 and 14 19922
- 16 limit 15 to humans 15645
- 17 16 not (neck or cervical or pelvic).ti,ab. 11456
